# Supplementary material
Source: PubMed Central journal article supplement (PMC8574296)
Supplement: gbaa135_suppl_Supplementary_Tables_Figures.pdf [file gbaa135_suppl_Supplementary_Tables_Figures.pdf]

Table S1. Association of neuropathologies with cognitive level and change

| Neuropathologic Indicator   | Global Cognition |               | Cognitive Change |                  |
|-----------------------------|------------------|---------------|------------------|------------------|
|                             | Estimate (SE)    | 95% CI        | Estimate (SE)    | 95% CI           |
| Amyloid                     | -0.03 (0.01)     | (-0.04,-0.02) | -0.001 (0.001)   | (-0.003,-0.0008) |
| Tau Tangles                 | -0.06 (0.001)    | (-0.07,-0.05) | -0.004 (0.0002)  | (-0.005,-0.004)  |
| Gross Infarcts              | -0.27 (0.05)     | (-0.37,-0.16) | -0.01 (0.005)    | (-0.02,-0.004)   |
| Microinfarcts               | -0.10 (0.05)     | (-0.21,0.01)  | 0.004 (0.005)    | (-0.006,0.01)    |
| Cerebral Amyloid Angiopathy | -0.08 (0.05)     | (-0.19,0.02)  | -0.005 (0.005)   | (-0.01,0.004)    |
| Atherosclerosis             | -0.17 (0.06)     | (-0.28,-0.06) | -0.01 (0.005)    | (-0.02,-0.006)   |
| Arteriolosclerosis          | -0.09 (0.06)     | (-0.20,0.01)  | -0.01 (0.005)    | (-0.02,-0.0008)  |
| Lewy bodies, neocortical    | -0.53 (0.07)     | (-0.67,-0.39) | -0.04 (0.01)     | (-0.05,-0.03)    |
| TDP-43                      | -0.09 (0.02)     | (-0.14,-0.05) | -0.004 (0.002)   | (-0.007,0.0003)  |
| Hippocampal Sclerosis       | -0.70 (0.09)     | (-0.87,-0.52) | -0.04 (0.01)     | (-0.05,-0.02)    |

Note. Adjusted for time between last cognitive assessment and death

Table S2. Associations of pathology type and personality trait

|                             | <b><u>Neuroticism</u></b>       |                       |                   |                   |
|-----------------------------|---------------------------------|-----------------------|-------------------|-------------------|
|                             | <b><u>Estimate</u></b>          | <b><u>Std Err</u></b> | <b><u>LCL</u></b> | <b><u>UCL</u></b> |
| Amyloid                     | 0.014                           | 0.007                 | 0.001             | 0.028             |
| Tau tangles                 | 0.009                           | 0.003                 | 0.003             | 0.016             |
| Gross infarcts              | -0.031                          | 0.058                 | -0.145            | 0.082             |
| Microinfarcts               | -0.021                          | 0.060                 | -0.139            | 0.098             |
| Cerebral amyloid angiopathy | -0.024                          | 0.058                 | -0.138            | 0.089             |
| Atherosclerosis             | 0.067                           | 0.060                 | -0.050            | 0.185             |
| Arteriolosclerosis          | 0.002                           | 0.060                 | -0.116            | 0.121             |
| Lewy bodies, neocortical    | 0.058                           | 0.079                 | -0.098            | 0.214             |
| TDP-43                      | 0.024                           | 0.027                 | -0.021            | 0.068             |
| Hippocampal sclerosis       | 0.093                           | 0.094                 | -0.095            | 0.277             |
|                             | <b><u>Extraversion</u></b>      |                       |                   |                   |
|                             | <b><u>Estimate</u></b>          | <b><u>Std Err</u></b> | <b><u>LCL</u></b> | <b><u>UCL</u></b> |
| Amyloid                     | 0.011                           | 0.007                 | -0.002            | 0.025             |
| Tau tangles                 | 0.007                           | 0.003                 | 0.001             | 0.014             |
| Gross infarcts              | -0.094                          | 0.057                 | -0.207            | 0.019             |
| Microinfarcts               | -0.052                          | 0.090                 | -0.140            | 0.066             |
| Cerebral amyloid angiopathy | -0.006                          | 0.057                 | -0.119            | 0.106             |
| Atherosclerosis             | -0.086                          | 0.059                 | -0.202            | 0.029             |
| Arteriolosclerosis          | -0.021                          | 0.059                 | -0.137            | 0.095             |
| Lewy bodies, neocortical    | 0.082                           | 0.080                 | -0.074            | 0.238             |
| TDP-43                      | 0.035                           | 0.022                 | -0.009            | 0.079             |
| Hippocampal sclerosis       | -0.014                          | 0.093                 | -0.196            | 0.169             |
|                             | <b><u>Conscientiousness</u></b> |                       |                   |                   |
|                             | <b><u>Estimate</u></b>          | <b><u>Std Err</u></b> | <b><u>LCL</u></b> | <b><u>UCL</u></b> |
| Amyloid                     | -0.329                          | 0.008                 | -0.049            | -0.017            |
| Tau tangles                 | -0.004                          | 0.004                 | -0.011            | 0.003             |
| Gross infarcts              | 0.039                           | 0.067                 | -0.091            | 0.170             |
| Microinfarcts               | 0.075                           | 0.069                 | -0.060            | 0.210             |
| Cerebral amyloid angiopathy | -0.005                          | 0.066                 | -0.135            | 0.124             |
| Atherosclerosis             | 0.036                           | 0.070                 | -0.101            | 0.173             |
| Arteriolosclerosis          | 0.045                           | 0.070                 | -0.092            | 0.183             |
| Lewy bodies, neocortical    | -0.188                          | 0.091                 | -0.367            | -0.010            |
| TDP-43                      | 0.003                           | 0.026                 | -0.048            | 0.054             |
| Hippocampal sclerosis       | -0.032                          | 0.110                 | -0.248            | 0.184             |
|                             | <b><u>Openness</u></b>          |                       |                   |                   |
|                             | <b><u>Estimate</u></b>          | <b><u>Std Err</u></b> | <b><u>LCL</u></b> | <b><u>UCL</u></b> |
| Amyloid                     | 0.018                           | 0.011                 | -0.009            | 0.033             |
| Tau tangles                 | 0.003                           | 0.005                 | -0.006            | 0.012             |

|                             |        |       |        |        |
|-----------------------------|--------|-------|--------|--------|
| Gross infarcts              | -0.049 | 0.081 | -0.209 | 0.110  |
| Microinfarcts               | -0.166 | 0.084 | -0.331 | -0.001 |
| Cerebral amyloid angiopathy | 0.005  | 0.079 | -0.151 | 0.161  |
| Atherosclerosis             | -0.134 | 0.080 | -0.292 | 0.023  |
| Arteriolosclerosis          | -0.155 | 0.084 | -0.319 | 0.009  |
| Lewy bodies, neocortical    | 0.295  | 0.112 | 0.074  | 0.516  |
| TDP-43                      | -0.035 | 0.032 | -0.098 | 0.027  |
| Hippocampal sclerosis       | -0.158 | 0.135 | -0.423 | 0.107  |

**Agreeableness**

|                             | <b><u>Estimate</u></b> | <b><u>Std Err</u></b> | <b><u>LCL</u></b> | <b><u>UCL</u></b> |
|-----------------------------|------------------------|-----------------------|-------------------|-------------------|
| Amyloid                     | 0.006                  | 0.011                 | -0.015            | 0.027             |
| Tau tangles                 | 0.006                  | 0.004                 | -0.004            | 0.014             |
| Gross infarcts              | -0.009                 | 0.082                 | -0.170            | 0.151             |
| Microinfarcts               | 0.057                  | 0.085                 | -0.109            | 0.224             |
| Cerebral amyloid angiopathy | 0.071                  | 0.080                 | -0.086            | 0.228             |
| Atherosclerosis             | -0.170                 | 0.080                 | -0.327            | -0.012            |
| Arteriolosclerosis          | 0.070                  | 0.084                 | -0.095            | 0.234             |
| Lewy bodies, neocortical    | 0.020                  | 0.114                 | -0.204            | 0.245             |
| TDP-43                      | -0.003                 | 0.032                 | -0.066            | 0.060             |
| Hippocampal sclerosis       | -0.026                 | 0.136                 | -0.293            | 0.241             |

---

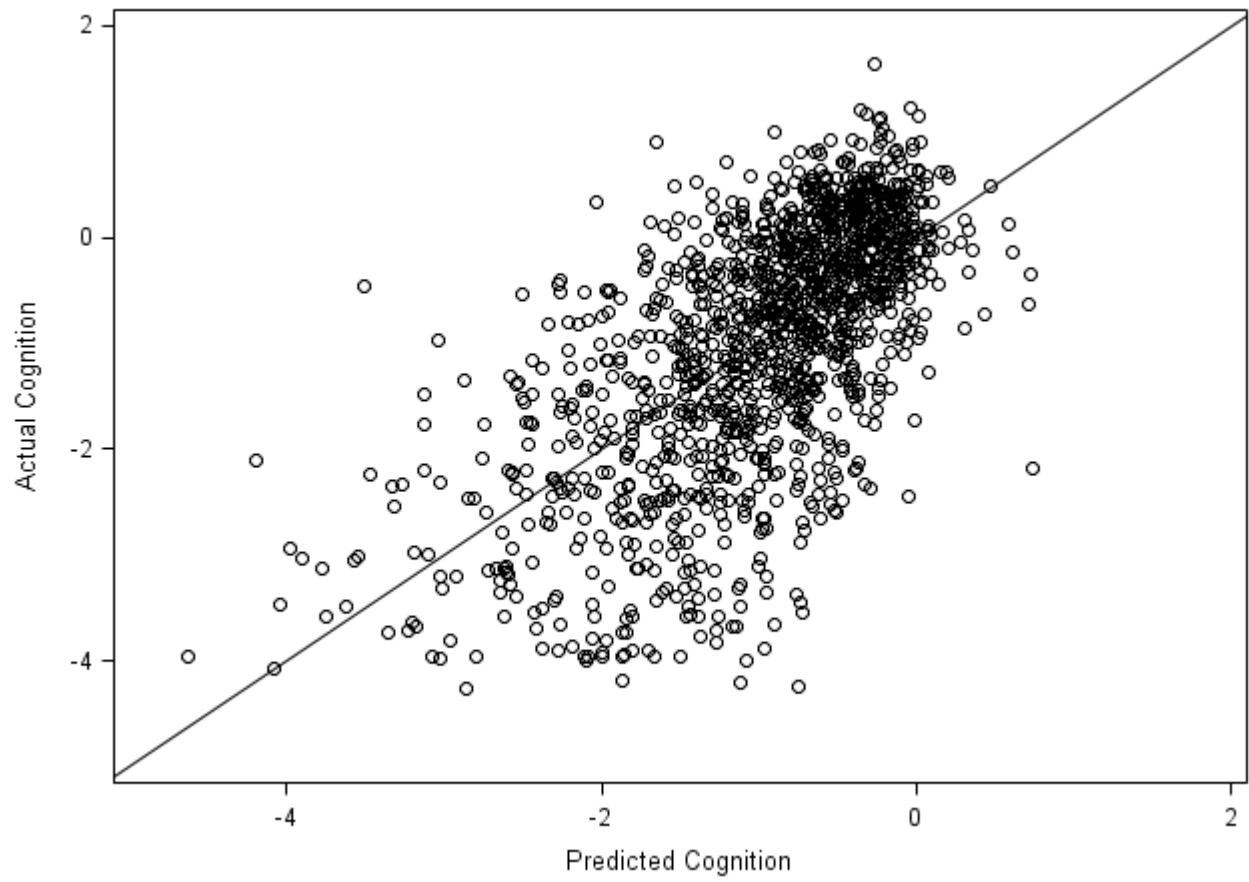

Figure S1. Predicted vs. Actual Cognition

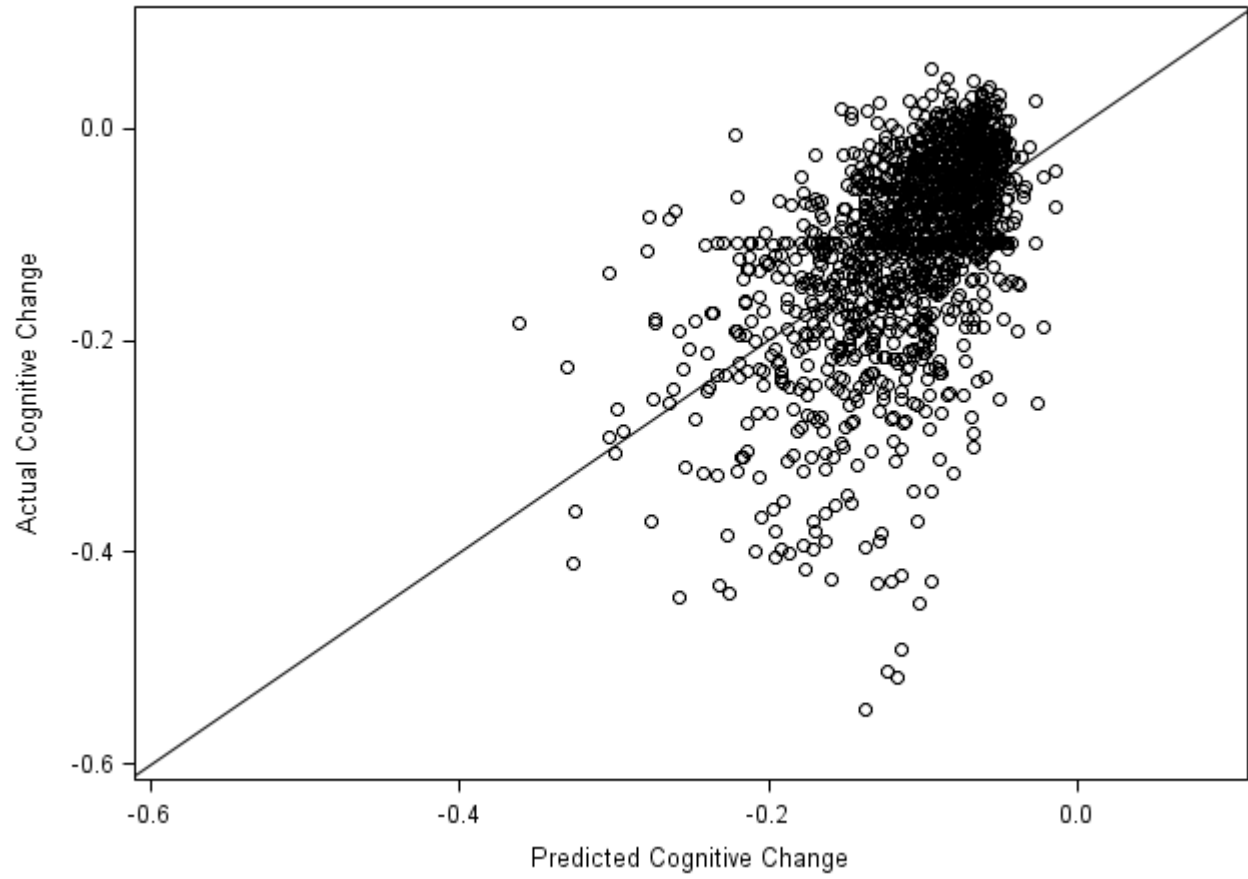

Figure S2. Actual vs. Predicted Cognitive Change.
